# Supplementary material for: Effects of Long-Term DHA Supplementation and Physical Exercise on Non-Alcoholic Fatty Liver Development in Obese Aged Female Mice
Source: PubMed Central journal article supplement (PMC7913512; doi:10.3390/nu13020501), 2021-02-03
Supplement: nutrients-13-00501-s001.pdf [file nutrients-13-00501-s001.pdf]

# Effects of long-term DHA supplementation and physical exercise on non-alcoholic fatty liver development in obese aged female mice

Jinchunzi Yang<sup>1</sup>, Neira Sáinz<sup>1</sup>, Elisa Félix-Soriano<sup>1</sup>, Eva Gil-Iturbe<sup>1</sup>, Rosa Castilla-Madrigal<sup>1</sup>, Marta Fernández-Galilea<sup>1,2</sup>, J Alfredo Martínez<sup>1,2,3</sup> and María J. Moreno-Aliaga<sup>1,2,3,\*</sup>

Table S1. Diets composition.

| Diet                                  | Standard HFD |      | HFD with DHA-rich n-3 PUFA Concentrate (containing mixed tocopherols*) |      | Standard HFD (with same amount of mixed tocopherols added)** |      |
|---------------------------------------|--------------|------|------------------------------------------------------------------------|------|--------------------------------------------------------------|------|
|                                       | D12451       |      | D16112301                                                              |      | D16112302                                                    |      |
| Product #                             | g            | kcal | g                                                                      | kcal | g                                                            | kcal |
| %                                     |              |      |                                                                        |      |                                                              |      |
| Protein                               | 23.7         | 20   | 23.7                                                                   | 20   | 23.7                                                         | 20   |
| Carbohydrate                          | 41.4         | 35   | 41.4                                                                   | 35   | 41.4                                                         | 35   |
| Fat                                   | 23.6         | 45   | 23.6                                                                   | 45   | 23.6                                                         | 45   |
| Total                                 |              | 100  |                                                                        | 100  |                                                              | 100  |
| kcal/g                                | 4.73         |      | 4.73                                                                   |      | 4.73                                                         |      |
| Ingredient                            |              |      |                                                                        |      |                                                              |      |
| Casein, 30 Mesh                       | 200          | 800  | 200                                                                    | 800  | 200                                                          | 800  |
| L-Cystine                             | 3            | 12   | 3                                                                      | 12   | 3                                                            | 12   |
| Corn Starch                           | 72.8         | 291  | 72.8                                                                   | 291  | 72.8                                                         | 291  |
| Maltodextrin 10                       | 100          | 400  | 100                                                                    | 400  | 100                                                          | 400  |
| Sucrose                               | 172.8        | 691  | 172.8                                                                  | 691  | 172.8                                                        | 691  |
| Cellulose, BW200                      | 50           | 0    | 50                                                                     | 0    | 50                                                           | 0    |
| Soybean Oil                           | 25           | 225  | 25                                                                     | 225  | 25                                                           | 225  |
| Lard                                  | 177.5        | 1598 | 147.1                                                                  | 1324 | 177.5                                                        | 1598 |
| High DHA Oil (Solutex 0063TG)*        | 0            | 0    | 30.4*                                                                  | 274  | 0                                                            | 0    |
| Mineral Mix S10026                    | 10           | 0    | 10                                                                     | 0    | 10                                                           | 0    |
| DiCalcium Phosphate                   | 13           | 0    | 13                                                                     | 0    | 13                                                           | 0    |
| Calcium Carbonate                     | 5.5          | 0    | 5.5                                                                    | 0    | 5.5                                                          | 0    |
| Potassium Citrate, 1 H <sub>2</sub> O | 16.5         | 0    | 16.5                                                                   | 0    | 16.5                                                         | 0    |
| Vitamin Mix V10001                    | 10           | 40   | 10                                                                     | 40   | 10                                                           | 40   |
| Choline Bitartrate                    | 2            | 0    | 2                                                                      | 0    | 2                                                            | 0    |
| Mixed tocopherols                     | 0            | 0    | 0                                                                      | 0    | 0.061                                                        | 0    |
| Total                                 | 858.15       | 4057 | 858.15                                                                 | 4057 | 858.21                                                       | 4057 |

\*The DHA-rich n-3 PUFA concentrate contains 2 mg/g of mixed tocopherols to prevent oxidation. \*\*A standard high fat diet (HFD) including the same amount of tocopherols contained in the HFD formulated with the DHA-rich concentrate was prepared. Diets were formulated and prepared by Research Diets Inc.

**Table S2.** Mouse primers sequences for SYBR GREEN real-time PCR.

| <b>Gene</b>                    | <b>Species</b>      | <b>Forward primer sequence (5' - 3')</b> | <b>Reverse primer sequence (5' - 3')</b> |
|--------------------------------|---------------------|------------------------------------------|------------------------------------------|
| <i>36b4</i>                    | <i>Mus musculus</i> | CACTGGTCTAGGACCCGAGAAG                   | GGTGCCTCTGGAGATTTTCG                     |
| <i>Fas</i>                     | <i>Mus musculus</i> | GCTGCGGAAACTTCAGGAAAT                    | AGAGACGTGTCACTCCTGGACTT                  |
| <i>Srebp1c</i>                 | <i>Mus musculus</i> | GGCCCGGGAAGTCACTGT                       | GGAGCCATGGATTGCACATT                     |
| <i>Dgat2</i>                   | <i>Mus musculus</i> | CCGCAAAGGCTTTGTGAAG                      | GGAATAAGTGGGAACCAGATCA                   |
| <i>Acox</i>                    | <i>Mus musculus</i> | CTATGGGATCAGCCAGAAAG                     | AGTCAAAGGCATCCACCAA                      |
| <i>Cpt1a</i>                   | <i>Mus musculus</i> | CACCAACGGGCTCATCTTCTA                    | CAAAATGACCTAGCCTTCTATCGAA                |
| <i>PPAR<math>\alpha</math></i> | <i>Mus musculus</i> | TCAGGGTACCACTACGGAGT                     | CTTGGCATTCTTCCAAAGCG                     |
| <i>Atg5</i>                    | <i>Mus musculus</i> | CGTGTATGAAAGAAGCTGATGC                   | ACGAAATCCATTTTCTTCTGGA                   |
| <i>Atg7</i>                    | <i>Mus musculus</i> | ATGCCAGGACACCCTGTGAACTTC                 | ACATCATTGCAGAAGTAGCAGCCA                 |
| <i>Xbp1</i>                    | <i>Mus musculus</i> | ATCAGCTTTTACGGGAGAAAATC                  | CCATTCCCAAGCGTGTCTT                      |
| <i>Ern1</i>                    | <i>Mus musculus</i> | GGTCCAATCGTACGGCAGTT                     | TCTCTCACAGAGCCACCTTTGTAG                 |
| <i>Tnfr1</i>                   | <i>Mus musculus</i> | CATCTTCTCAAATTCGAGTGACAA                 | TGGGAGTAGACAAGGTACAACCC                  |
| <i>Tlr4</i>                    | <i>Mus musculus</i> | TCGAATCCTGAGCAAACAGC                     | GTGGACGGGTTCGATGTCAC                     |
| <i>Hsl</i>                     | <i>Mus musculus</i> | CTGCTTCTCCCTCTCGTCTG                     | CAAAATGGTCTCTGCCTCT                      |

**Table S3.** Mouse primers references for Taqman real-time PCR.

| <b>Gene</b> | <b>Species</b>      | <b>Reference</b> |
|-------------|---------------------|------------------|
| <i>Mcp1</i> | <i>Mus musculus</i> | Mm00441242_m1    |
| <i>Il6</i>  | <i>Mus musculus</i> | Mm00446190_m1    |
| <i>Scd1</i> | <i>Mus musculus</i> | Mm00772290_m1    |
